# Supplementary material for: Annals V and VI (Book)
Source: Royal Society of Chemistry journal article supplement (doi:10.1039/c002773a), 2003-01-01
Supplement: c002773a.pdf [file c002773a.pdf]

## Structure and Absolute Configuration of Cytotoxic Polyketide Pigments from the Fruiting Bodies of the Fungus *Cortinarius rufo-olivaceus* (Basidiomycetes)

Jian-Chun Qin, Jin-Ming Gao,\* Gennaro Pescitelli, Sebastiano Di Pietro, Hartmut Laatsch, Ya-Tuan Ma, Ming-Sheng Bai

### Supporting Information

Figure S1. DFT-calculated low-energy structures and energies for compound (aS)-1.

Figure S2. DFT-calculated lowest-energy structure for compound (aS)-1 in the “ND” tautomeric form.

Figure S3. CD spectra of rufoolivacins **1-4** in acetonitrile.

Figure S4. CD spectra of rufoolivacins **1-4** in THF.

Figure S5. Comparison between CAM-B3LYP/SVP and CAM-B3LYP/TZVP calculations on the lowest-energy B3LYP/6-31G(d)-optimized structure I for (aS)-1.

Figure S6. ZINDO/S-CI calculated CD spectra on DFT-optimized low-energy structures I-IV for of (aS)-(1), and their weighted average.

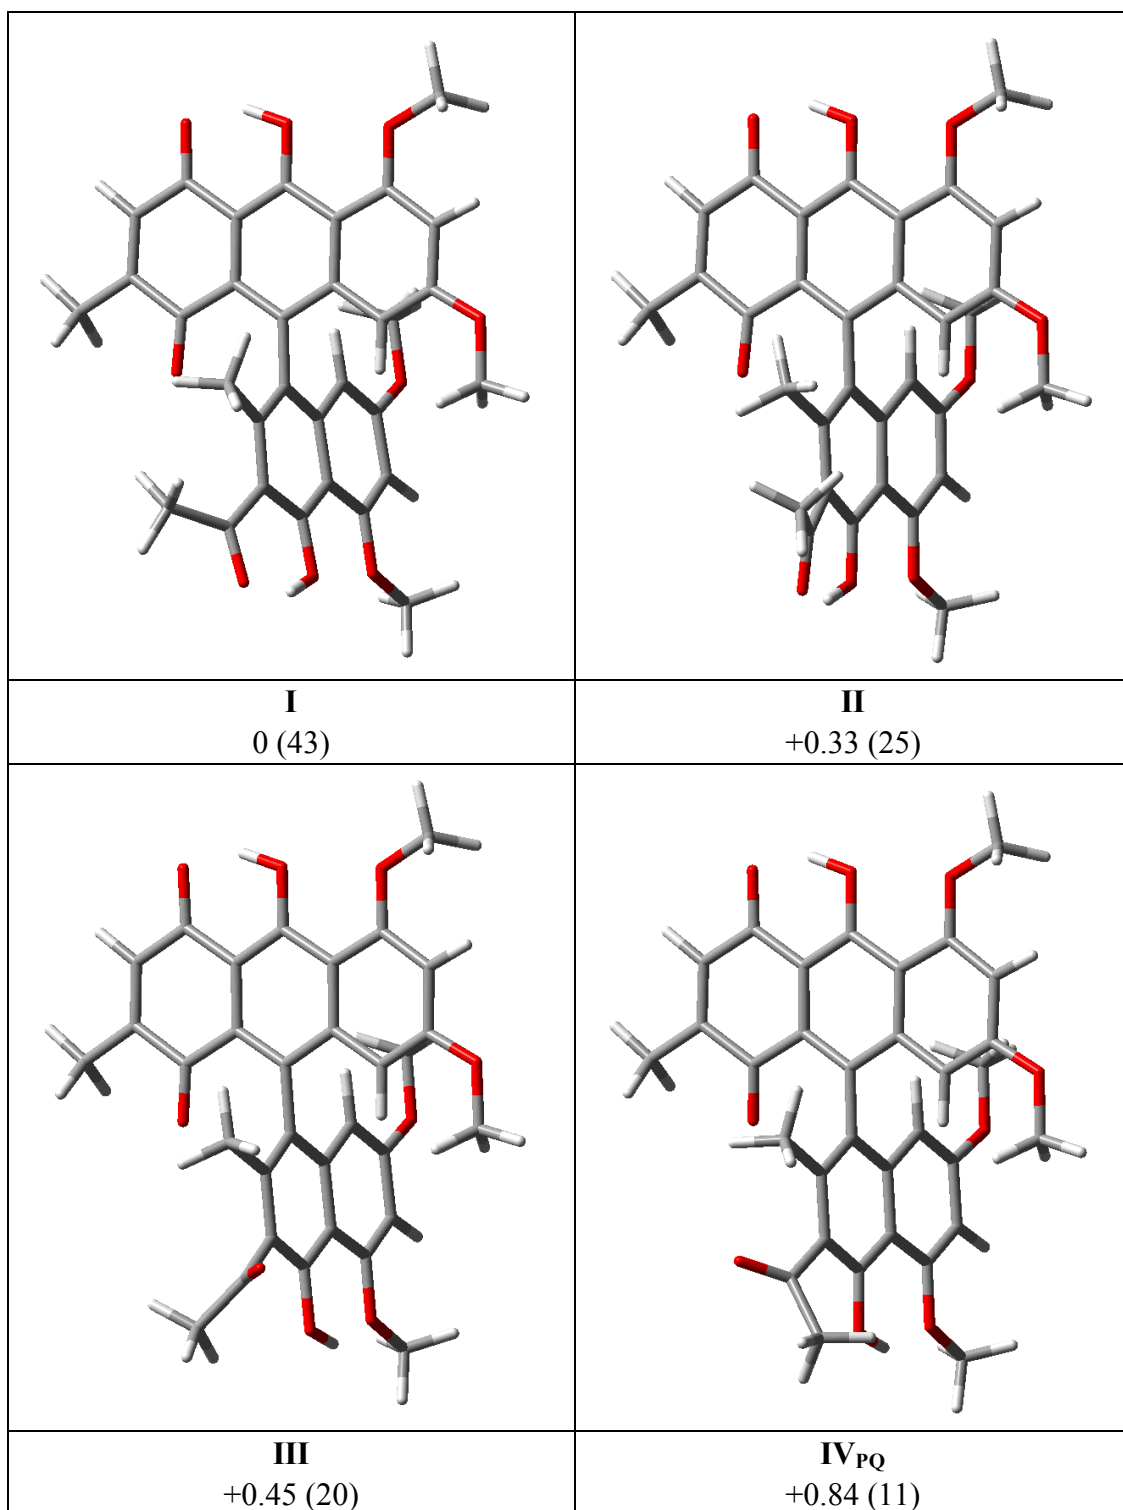

**Figure S1.** DFT-calculated low-energy structures for compound (aS)-1, with relative energies in kcal/mol (and Boltzmann populations at 300K).

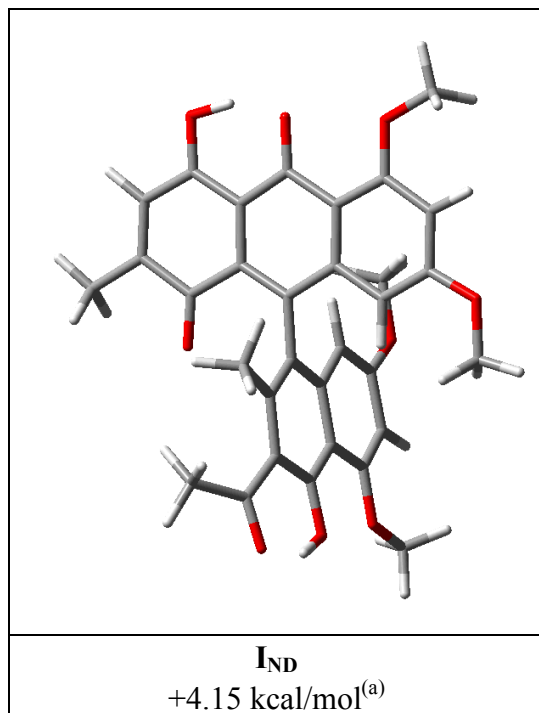

**Figure S2.** DFT-calculated lowest-energy structure for compound (aS)-1 in the “ND” tautomeric form.

<sup>(a)</sup> Relatively to **I** shown in Figure S1.

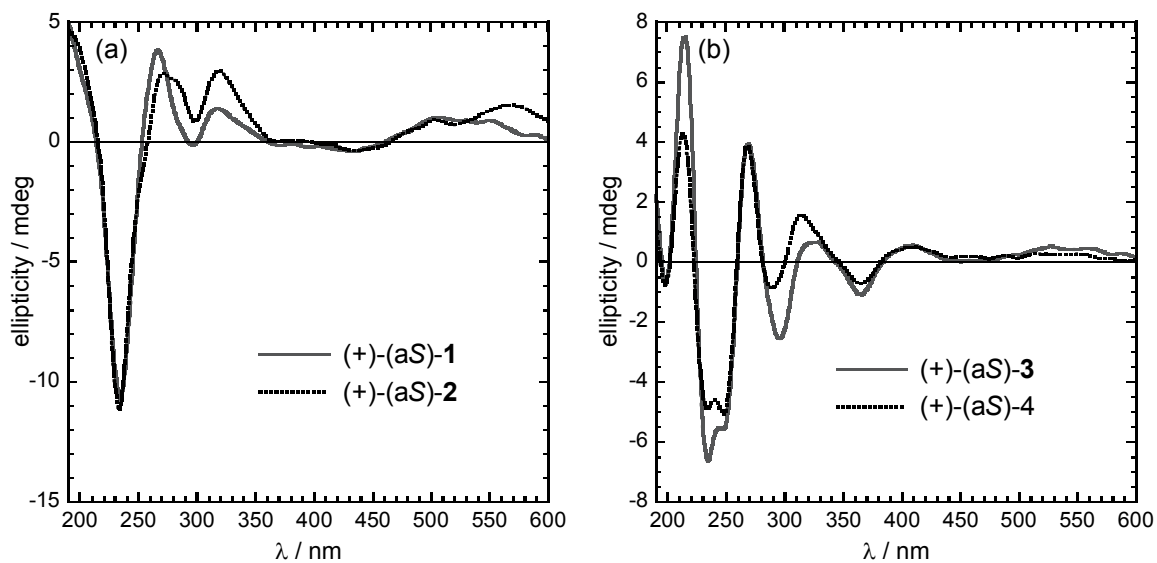

**Figure S3.** CD spectra of rufoolivacins **1-4** in acetonitrile. Concentrations 2-2.5 mM, 0.02 cm cell.

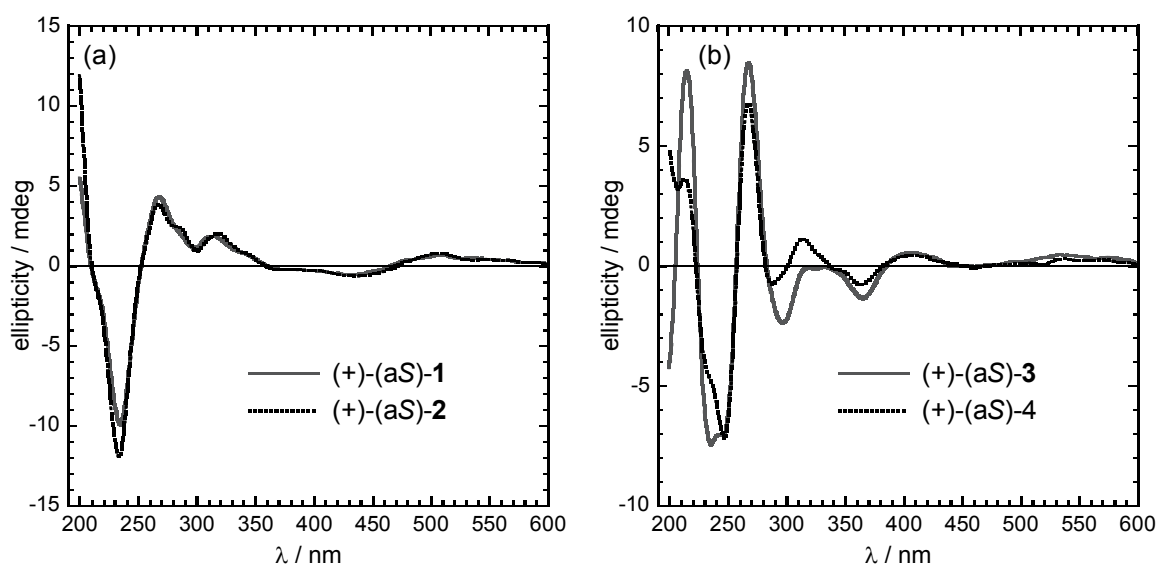

**Figure S4.** CD spectra of rufoolivacins **1-4** in THF. Concentrations 2-2.5 mM, 0.02 cm cell.

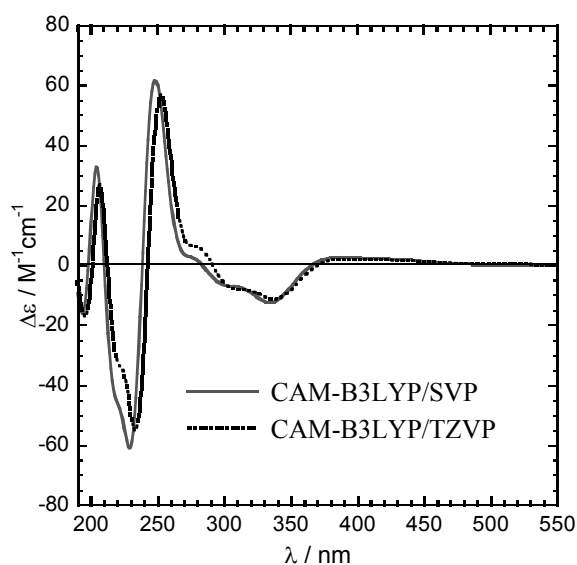

**Figure S5.** Comparison between CD spectra calculated with CAM-B3LYP/SVP and CAM-B3LYP/TZVP on the lowest-energy structure I optimized with B3LYP/6-31G(d) for (aS)-rufoolivacin (**1**).

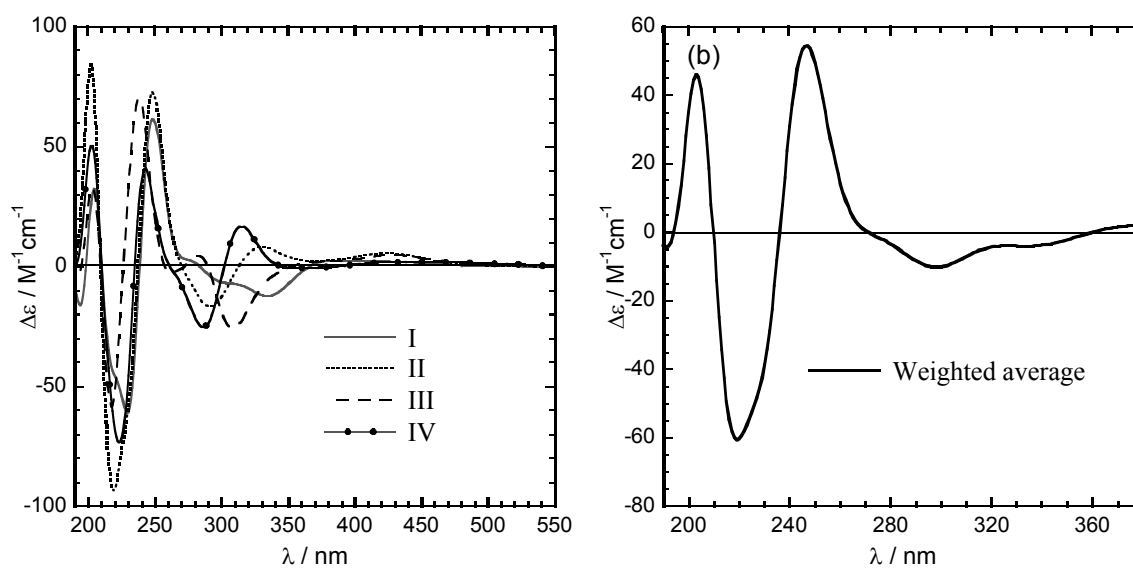

**Figure S6.** (a) CD spectra calculated with ZINDO/S-CI on the low-energy structures I-IV optimized with B3LYP/6-31G(d) for (aS)-rufoolivacin (**1**). (b) Expansion of the weighted average of the four spectra shown in (a).
